# Supplementary material
Source: MDPI journal article supplement (https://www.mdpi.com/2075-163X/10/3/247)
Supplement: s1 [file s1]

## Sheet: Biovailable
Center Creek					%A = % extracted by solution A (0.11 M Hac) = % bioavailable
			exch
	Zn_tot	Zn_A	%ZnA		Cd_Tot	Cd_A	%Cd_A		Pb_Tot	Pb_A	%Pb_A
Sample No.	mg/kg	ug/ml ]			mg/kg	mg/kg			mg/kg	mg/kg
FB 5	436	58.2	13.3486		3.9	0.13488	3.45846		85	2.018	2.37412
FB 6	441	12.32	2.79365		4	0.14084	3.521		88	1.876	2.13182
FB 7	426	12.16	2.85446		3.8	0.12312	3.24		76	1.397	1.83816
above: background, negligible metal.			Below: with metal
FB 1	9930	66.56	0.670292		54.3	0.00688	0.0126703		595	0.69464	0.116746
FB 2	9480	86.08	0.908017		37.2	0.01828	0.0491398		596	0.78324	0.131416
FB 3	7000	120.44	1.72057		16.7	0.04732	0.283353		1010	3.63104	0.359509
FB 4	4810	11.72	0.243659		6.4	0.01284	0.200625		898	0.97276	0.108325
FB 8	6790	132.24	1.94757		77.4	0.29688	0.383566		420	0.83188	0.198067
FB 9	5810	134.44	2.31394		50.7	0.34828	0.686943		469	1.7194	0.36661
FB 10	2330	93.52	4.01373		16.7	0.5548	3.32216		481	1.97748	0.411119
FB 11	2510	89.32	3.55857		17.8	0.61192	3.43775		464	0.83468	0.179888
FB 12	6030	170.16	2.82189		42.5	0.94088	2.21384		726	4.87648	0.671691
FB 13	5140	150.64	2.93074		34.5	0.79252	2.29716		573	4.13716	0.722017
FB 14	8360	123.16	1.47321		53.7	0.49632	0.924246		561	3.72048	0.663187
	median	Zn	1.94757			Cd	0.686943			Pb	0.359509
	std dev		1.14793				1.25364				0.224848
Turkey Creek
	Zn-ALS (mg/kg)	Zn-Exch (mg/kg)	%A		Pb-ALS mg/kg	PbExch mg/kg	%A		Cd ALS	Cd Exch, mg/kg	%
1	1480	176.76	11.9432		274	2.8492	1.03985		12	0.33152	2.76267
2	1050	89.24	8.49905		212	1.4828	0.699434		7.9	0.12576	1.5919
3	1050	89.24	8.49905		346	0.08364	0.0241734		6.2	0.636	10.2581
4	2860	580	20.2797		471	1.9488	0.413758		20.9	2.5272	12.0919
5	5070	390.36	7.69941		453	1.9836	0.437881		17.5	1.9696	11.2549
6	3570	201.4	5.64146		176	2.6076	1.48159		10.8	0.17304	1.60222
7	942	7.508	0.797028		122	0.5416	0.443934		4.3	0.05	1.16279
8	2280	113.04	4.95789		131	0.5288	0.403664		9.5	0.05	0.526316
11	6950	163.44	2.35165		161	0.023972	0.0148894		21.3	0.33804	1.58704
12	2490	177.08	7.11165		146	0.5748	0.393699		10.2	0.10268	1.00667
13	3280	191.32	5.83293		185	1.0644	0.575351		12.9	0.942	7.30233
14	1920	163.44	8.5125		159	0.23268	0.14634		10.6	0.7408	6.98868
15	37100	451.6	1.21725		192	0.17764	0.0925208		113.5	0.8472	0.746432
16	2710	224.52	8.28487		118	0.544	0.461017		10.2	0.714	7
17	2700	247.04	9.14963		142	0.078424	0.0552282		10.8	1.3056	12.0889
18	35800	213.88	0.59743		226	1.1044	0.488673		127	0.33976	0.267528
19	8190	196.64	2.40098		152	0.24096	0.158526		35.4	0.5684	1.60565
	median	Zn	4.95789			Pb	0.393699			Cd	1.58704
	std dev		4.70158				0.369731				4.34889
9	902	lost			110	0.39464	0.358764		3.7	0.039916	1.07881
10	915	178.36	19.4929		115	0.23268	0.20233		4.5	nd

## Sheet: T-test
	mg/kg
Downstream	TC Cd	CC Cd	TC Zn	CC Zn	TC Pb	CC Pb	PEC-Q	PEC-Q		t-Test: Two-Sample Assuming Equal Variances				t-Test: Two-Sample Assuming Equal Variances
1	12	54.3	1480	9930	274	595	7.77466	37.186
2	7.9	37.2	1210	9480	212	596	5.87876	32.7797			TC Cd	CC Cd			PEC-Q	PEC-Q
3	6.2	16.7	1050	7000	346	1010	6.23569	26.4946		Mean	22.2167	29.9714		Mean	17.5103	20.7624
4	20.9	6.4	2860	4810	471	898	14.1074	18.7801		Variance	905.404	550.691		Variance	654.105	154.465
5	65.5	3.9	7180	436	1870	85	43.4047	2.39709		Observations	30	14		Observations	30	14
6	20.5	4	4130	441	1000	88	20.9268	2.4515		Pooled Variance	795.612			Pooled Variance	499.455
7	6.3	3.8	585	426	71	76	3.09426	2.28491		Hypothesized Mean Difference	0			Hypothesized Mean Difference	0
8	53.6	77.4	7280	6790	590	420	31.233	33.6164		df	42			df	42
9	11.2	50.7	1830	5810	127	469	7.22811	26.5027		t Stat	-0.849407			t Stat	-0.449581
10	8.6	16.7	271	2330	64	481	2.81732	12.1875		P(T<=t) one-tail	0.200235			P(T<=t) one-tail	0.327662
11	4.4	17.8	462	2510	51	464	2.28851	12.6677		t Critical one-tail	1.68195			t Critical one-tail	1.68195
12	5.7	42.5	854	6030	128	726	4.00514	27.3433		P(T<=t) two-tail	0.40047			P(T<=t) two-tail	0.655325
13	10.1	34.5	1460	5140	144	573	6.33394	22.6025		t Critical two-tail	2.01808			t Critical two-tail	2.01808
14	19.3	53.7	2420	8360	291	561	11.4213	33.3795
15	12.1		1710		163		7.42865			t-Test: Two-Sample Assuming Equal Variances
16	17.5		5070		453		18.0989
17	10.8		3570		176		11.3215				TC Zn	CC Zn
18	4.3		942		122		3.86887			Mean	4986.7	4963.79
19	9.5		2280		131		7.89839			Variance	7.7898e+07	1.08068e+07
20	3.7		902		110		3.56749			Observations	30	14
21	4.5		915		115		3.79552			Pooled Variance	5.71317e+07
22	21.3		6950		161		20.6765			Hypothesized Mean Difference	0
23	10.2		2490		146		8.61365			df	42
24	12.9		3280		185		11.1816			t Stat	0.00936626
25	10.6		1920		159		7.55371			P(T<=t) one-tail	0.496286
26	113.5		37100		192		105.119			t Critical one-tail	1.68195
27	10.2		2710		118		8.87421			P(T<=t) two-tail	0.992571
28	10.8		2700		142		9.1604			t Critical two-tail	2.01808
29	127		35800		226		105.263
30	35.4		8190		152		26.1391			t-Test: Two-Sample Assuming Equal Variances
											TC Pb	CC Pb
										Mean	279.667	503
										Variance	126960	79039.1
										Observations	30	14
										Pooled Variance	112127
										Hypothesized Mean Difference	0
										df	42
										t Stat	-2.06061
										P(T<=t) one-tail	0.0227845
										t Critical one-tail	1.68195
										P(T<=t) two-tail	0.045569
										t Critical two-tail	2.01808
T-test bioavailable fraction		C= Center Cr
Center Cr	Zn	Zn_A	C_Zn_%A	T_Zn_%A	C_Pb_A%	T_Pb_%A	C_Cd_A	T_Cd_%A
FB 1	9930	66.56	0.670292	11.9432	0.116746	1.03985	0.0126703	2.76267
FB 2	9480	86.08	0.908017	8.49905	0.131416	0.699434	0.0491398	1.5919
FB 3	7000	120.44	1.72057	8.49905	0.359509	0.0241734	0.283353	10.2581
FB 4	4810	11.72	0.243659	20.2797	0.108325	0.413758	0.200625	12.0919		t-Test: Two-Sample Assuming Equal Variances				t-Test: Two-Sample Assuming Equal Variances
FB 8	6790	132.24	1.94757	7.69941	0.198067	0.437881	0.383566	11.2549
FB 9	5810	134.44	2.31394	5.64146	0.36661	1.48159	0.686943	1.60222			c_Zn_%A	T_Zn_%A			C_Pb_A%	T_Pb_%A
FB 10	2330	93.52	4.01373	0.797028	0.411119	0.443934	3.32216	1.16279		Mean	2.05474	6.69269		Mean	0.357143	0.431208
FB 11	2510	89.32	3.55857	4.95789	0.179888	0.403664	3.43775	0.526316		Variance	1.44952	23.4864		Variance	0.0556124	0.145245
FB 12	6030	170.16	2.82189	2.35165	0.671691	0.0148894	2.21384	1.58704		Observations	11	17		Observations	11	17
FB 13	5140	150.64	2.93074	7.11165	0.722017	0.393699	2.29716	1.00667		Pooled Variance	15.0107			Pooled Variance	0.110771
FB 14	8360	123.16	1.47321	5.83293	0.663187	0.575351	0.924246	7.30233		Hypothesized Mean Difference	0			Hypothesized Mean Difference	0
				8.5125		0.14634		6.98868		df	26			df	26
				1.21725		0.0925208		0.746432		t Stat	-3.09362			t Stat	-0.575096
				8.28487		0.461017		7		P(T<=t) one-tail	0.00234167			P(T<=t) one-tail	0.285085
				9.14963		0.0552282		12.0889		t Critical one-tail	1.70562			t Critical one-tail	1.70562
				0.59743		0.488673		0.267528		P(T<=t) two-tail	0.00468335			P(T<=t) two-tail	0.57017
				2.40098		0.158526		1.60565		t Critical two-tail	2.05553			t Critical two-tail	2.05553
				0.00468335		0.57017		0.0206934
				less than 0.05				less than 0.05		t-Test: Two-Sample Assuming Equal Variances
				different pop
											C_Cd_A%	T_Cd_%A
										Mean	1.25559	4.6967
										Variance	1.72878	20.0949
										Observations	11	17
										Pooled Variance	13.031
										Hypothesized Mean Difference	0
										df	26
										t Stat	-2.4635
										P(T<=t) one-tail	0.0103467
										t Critical one-tail	1.70562
										P(T<=t) two-tail	0.0206934
										t Critical two-tail	2.05553

## Sheet: Turkey_A
Sample	Zn_A	%Zn_A	Pb_A, mg/kg	%Pb_A	Cd_A, mg/kg	%Cd_A
1	123.4	0.8	13.7	0.4	nd	0	zeroes were substituted by one half of the limit of detection
2	117.1	1.2	4.5	0.4	nd	0
3	115.1	1.2	5.7	0.7	nd	0
4	297.4	0.6	15.6	0.2	2	0.7
4D	261.6	0.5	10.3	0.1	1.8	0.6
4D2	268.1	0.5	10.7	0.1	1.8	0.6
5	1.6	0.2	0.7	0.3	0.1	2.7
6	3.1	0.5	2.3	1	0.1	4
7	133.9	2	60	4.4	1.8	14.4
8	153	1.9	66.7	3.9	0.2	1.7
9	29.7	1.5	0.5	0.6	0.1	1.5
10	16.3	2.1	0.5	0.9	0.1	1.5
10 LD	12.8	1.6	nd	0	0.1	3.3
11	24.9	2.9	nd	0	0.1	4.6
12	13.7	2.8		0	0.1	10.8
13	33	5.6		0	0.2	12.8
13 LD	22.2	4	0.1	0.1	0.2	12.3
14	32.4	4.8	nd	0	0.2	12.3
15	32.9	3.8	nd	0	0.2	10.5
16	56.5	1	nd	0	nd	0
17	30.2	0.5	nd	0	nd	0
17 FD	45	0.7	nd	0	nd	0
18	46.7	0.8	nd	0	nd	0
19	44.4	0.8			nd	0
20	48.9	0.8			nd	0
21	57.1	1.2	0.2	0.1	nd	0
22	69.1	1.2	nd	0	nd	0
23	61.7	0.9	nd	0	nd	0
24	133.9	2.3	0.2	0.1	nd	0
25	88.1	2.1	0.1	0.1	nd	0
26	97.3	1.7	nd	0	nd	0
27	125.7	1.7	nd	0	nd	0
27 LD	118	1.6	nd	0	nd	0
28	48.9	1.3	nd	0	nd	0
29	37.7	0.9	0.3	0.3	nd	0
31	119.8	2.3	2.1	1	nd	0
32	110.5	4.4	nd	0	nd	1
33	194.6	3.6	5	1.8	1.5	4.5
34	170.5	2.3	0.9	0.4	nd	0
36	276	3.7	0.4	0.3	nd	1
37	154.5	3.6	7.6	2.8	2.2	7.5
38	318.3	2.7	14.3	2.2	36.4	44.2
38 LD	307.5	2.6	12.6	1.9	33.1	40.2
42	287	1.6	74.9	3.1	0.1	0.3
43	113.8	2.6	0.5	0.1	0.2	1.4
44	126.6	5	4.4	1.2	0.5	4.2
45	215.3	2.7	8.5	0.7	0.3	0.8
46	140	6.7	0.3	0.3	0.2	1.5
47	263	4.6	1.2	0.6	2.4	5.8
s1	17.1	29.4	nd	0	nd	0
s1 FD	11.6	9.7	nd	0	nd	0
s7	50.1	1.8	nd	0	0.4	7.6
Ave		2.8		0.6		4.2
Bioavail.
Field Duplicates
7	133.9	2	60	4.4	1.8	14.4
8	153	1.9	66.7	3.9	0.2	1.7
ave		1.95
std dev		0.0707107
16	56.5	1	nd	0	nd	0
17	30.2	0.5	nd	0	nd	0
ave		0.75
std dev		0.353553
44	126.6	5	4.4	1.2	0.5	4.2
45	215.3	2.7	8.5	0.7	0.3	0.8
ave		3.85
std dev		1.62635

## Sheet: Turkey_ALS
RE18222551 - Finalized
CLIENT : "OZX - Missouri State University"
# of SAMPLES : 11
DATE RECEIVED : 2018-09-07 DATE FINALIZED : 2018-09-24
PROJECT : "Research"
CERTIFICATE COMMENTS : ""
PO NUMBER : " "
	WEI-21	ME-ICP41	ME-ICP41	ME-ICP41	ME-ICP41	ME-ICP41	ME-ICP41	ME-ICP41	ME-ICP41	ME-ICP41	ME-ICP41	ME-ICP41	ME-ICP41	ME-ICP41	ME-ICP41	ME-ICP41	ME-ICP41	ME-ICP41	ME-ICP41	ME-ICP41	ME-ICP41	ME-ICP41	ME-ICP41	ME-ICP41	ME-ICP41	ME-ICP41	ME-ICP41	ME-ICP41	ME-ICP41	ME-ICP41	ME-ICP41	ME-ICP41	ME-ICP41	ME-ICP41	ME-ICP41	ME-ICP41
SAMPLE	Recvd Wt.	Ag	Al	As	B	Ba	Be	Bi	Ca	Cd	Co	Cr	Cu	Fe	Ga	Hg	K	La	Mg	Mn	Mo	Na	Ni	P	Pb	S	Sb	Sc	Sr	Th	Ti	Tl	U	V	W	Zn
DESCRIPTION	kg	ppm	%	ppm	ppm	ppm	ppm	ppm	%	ppm	ppm	ppm	ppm	%	ppm	ppm	%	ppm	%	ppm	ppm	%	ppm	ppm	ppm	%	ppm	ppm	ppm	ppm	%	ppm	ppm	ppm	ppm	ppm
20	0.02	<0.2	0.66	16	<10	70	1	<2	0.67	65.5	16	83	26	3.4	10	<1	0.03	10	0.16	709	1	0.01	14	580	1870	0.17	2	1	7	<20	0.02	<10	<10	68	<10	7180
21	0.02	<0.2	0.57	22	<10	60	1.1	<2	0.82	20.5	12	169	17	4.6	10	<1	0.02	10	0.21	980	2	0.01	14	650	1000	0.06	<2	1	5	<20	0.02	<10	<10	102	<10	4130
22	0.02	<0.2	0.92	8	<10	110	0.7	<2	0.22	6.3	7	15	9	1.16	<10	<1	0.05	20	0.08	146	<1	<0.01	8	110	71	0.03	<2	2	6	<20	0.01	<10	<10	22	<10	585
23	0.02	<0.2	0.86	4	<10	120	0.9	<2	0.48	53.6	8	15	29	1.27	<10	<1	0.07	20	0.14	447	<1	0.01	15	260	590	0.42	<2	2	8	<20	0.01	<10	<10	24	<10	7280
24	<0.02	<0.2	0.64	5	<10	70	0.6	<2	1.51	11.2	9	24	10	1.19	<10	<1	0.04	10	0.06	378	<1	<0.01	10	210	127	0.08	<2	1	10	<20	0.01	<10	<10	25	<10	1830
25	0.02	<0.2	3.19	22	<10	280	3.1	<2	0.59	8.6	22	43	30	5.22	10	<1	0.19	40	0.13	3310	2	0.01	60	510	64	0.02	2	11	12	20	0.02	<10	<10	73	<10	271
27	0.02	<0.2	0.71	3	<10	100	0.6	<2	0.23	4.4	5	13	9	0.71	<10	<1	0.05	10	0.06	138	<1	0.01	6	130	51	0.11	2	2	6	<20	0.01	<10	<10	22	<10	462
28	0.02	<0.2	0.66	9	<10	80	0.9	<2	0.4	5.7	10	58	23	2.32	<10	<1	0.04	10	0.05	1040	1	0.01	12	340	128	0.02	<2	2	5	<20	0.01	<10	<10	54	<10	854
29	0.02	<0.2	0.76	7	<10	140	0.9	<2	0.57	10.1	12	41	9	2.24	<10	<1	0.05	20	0.06	997	<1	0.01	13	300	144	0.03	2	2	7	<20	0.01	<10	<10	44	<10	1460
30	0.02	<0.2	0.83	6	<10	120	0.8	<2	0.46	19.3	10	20	18	1.71	<10	<1	0.06	20	0.07	820	1	0.01	11	320	291	0.07	<2	2	7	<20	0.01	<10	<10	28	<10	2420
31	0.02	<0.2	0.96	10	<10	130	1	<2	1.28	12.1	12	32	11	2.66	<10	<1	0.06	20	0.07	852	1	0.01	16	440	163	0.06	<2	2	11	<20	0.01	<10	<10	44	<10	1710

## Sheet: CenterA-ICP
Sample							55 Mn [ No Gas ]		56 Fe [ No Gas ]		66 Zn [ No Gas ]		111 Cd [ No Gas ]		208 Pb [ No Gas ]		45 Sc ( ISTD ) [ No Gas ]
	Rjct	Data File	Acq. Date-Time	Type	Level	Sample Name	CPS	CPS RSD	CPS	CPS RSD	CPS	CPS RSD	CPS	CPS RSD	CPS	CPS RSD	CPS	CPS RSD
	FALSE	001_BKG.d	2019-10-17 15:45:24	Bkgnd			46986.4	3.4	3.30446e+06	3	74691.4	1.3	342.68	5.5	27078.3	1.6	3.88542e+07	3.5
	FALSE	002CALB.d	2019-10-17 15:47:44	CalBlk	1	CalBlank	-356.48	-305.3	-94334.8	-97.3	-153.36	-768.9	-18	-128.8	240.56	151.1	3.8642e+07	1.5
	FALSE	003CALS.d	2019-10-17 15:50:04	CalStd	2	Std 1	5.14292e+08	1.3	512356007	2	8.56697e+07	0.9	8.93401e+06	1.5	5.35549e+07	1.7	40650944	1.5
56 Fe [ No Gas ] : CPS RSD value = 6.21 is over the allowed maximum = 5.0066 Zn [ No Gas ] : CPS RSD value = 6.49 is over the allowed maximum = 5.00111 Cd [ No Gas ] : CPS RSD value = 7.40 is over the allowed maximum = 5.00208 Pb [ No Gas ] : CPS RSD value = 5.49 is over the allowed maximum = 5.00	FALSE	004CALS.d	2019-10-17 15:52:28	CalStd	3	Std 2	1.23906e+08	4.9	122719879	6.2	2.08808e+07	6.5	2.18313e+06	7.4	1.26974e+07	5.5	3.83745e+07	4.8
	FALSE	005CALS.d	2019-10-17 15:54:47	CalStd	4	Std 3	5.20897e+07	1.3	50823607	2.8	8.57192e+06	0.4	787046	1	5.28431e+06	1.4	3.93314e+07	0.9
	FALSE	006CALS.d	2019-10-17 15:57:03	CalStd	5	Std 4	1.19755e+07	3.9	11551009	4	2.04893e+06	2.2	188129	1.4	833442	2.5	3.83817e+07	1.7
56 Fe [ No Gas ] : CPS RSD value = 45.91 is over the allowed maximum = 5.00	FALSE	007SMPL.d	2019-10-17 15:59:23	Sample		Blank Check	3825.85	13.5	31706.2	45.9	8340.29	5.8	22.66	143.5	4430.26	15.3	42201216	1.2
	FALSE	008SMPL.d	2019-10-17 16:01:42	Sample		QC 5 500	2.58333e+08	1	2.58254e+08	0.1	4.36135e+07	0.7	4.63593e+06	1.4	2.74723e+07	0.8	3.96612e+07	1.2
	FALSE	009SMPL.d	2019-10-17 16:04:05	Sample		BLANK FA1	182283	2.1	-534976	-10.7	-8213.06	-20.5	323.34	5.4	224172	2.9	32892054	2.4
	FALSE	010SMPL.d	2019-10-17 16:06:27	Sample		BLANK FA2	415105	1.6	-631476	-6.5	-29077.8	-0.9	54	24.7	113331	2.6	34811860	1.3
	FALSE	011SMPL.d	2019-10-17 16:08:48	Sample		FA 1	3.59766e+07	2.6	8.41521e+06	3.6	1.13993e+07	2.6	1224.76	2.1	742283	0.8	3.24279e+07	1.1
	FALSE	012SMPL.d	2019-10-17 16:11:05	Sample		FA 2	2.88052e+07	2	6.29691e+06	2.6	1.60285e+07	1.5	3545.25	2.4	910276	2.9	3.52637e+07	2.5
	FALSE	013SMPL.d	2019-10-17 16:13:24	Sample		FA 3	8.174e+07	0.9	1.18293e+06	2.4	2.22224e+07	1.4	9096.76	2.4	4.18056e+06	1.1	34943236	1
56 Fe [ No Gas ] : CPS RSD value = 11.78 is over the allowed maximum = 5.00	FALSE	014SMPL.d	2019-10-17 16:15:40	Sample		FA 4	6.62716e+07	1	749921	11.8	1.11847e+07	2.8	2572.34	4.8	1.16647e+06	1.3	3.63951e+07	2
56 Fe [ No Gas ] : CPS RSD value = 10.51 is over the allowed maximum = 5.00	FALSE	015SMPL.d	2019-10-17 16:17:57	Sample		FA 5	2.99769e+07	1.5	482113	10.5	2.57187e+06	1.4	29310.5	0.1	105343	2	3.95126e+07	2
56 Fe [ No Gas ] : CPS RSD value = 135.39 is over the allowed maximum = 5.00	FALSE	016SMPL.d	2019-10-17 16:20:16	Sample		Blank Check	1717.87	34.6	48645.2	135.4	1397.03	77.3	-44.67	-29.4	-785.8	-51.2	3.96021e+07	0.8
	FALSE	017SMPL.d	2019-10-17 16:22:34	Sample		QC 5 500	2.59685e+08	0.8	2.61929e+08	3.1	4.41169e+07	3.1	4.61592e+06	2.5	2.57907e+07	2	4.09583e+07	1.3
	FALSE	018SMPL.d	2019-10-17 16:24:58	Sample		FA 6	2.68015e+07	1.9	-115691	-37.9	2.24323e+06	1.8	27056.6	1.6	86521.6	3.6	34913076	1.2
	FALSE	019SMPL.d	2019-10-17 16:27:17	Sample		FA 7	2.23065e+07	1.8	1.46109e+06	0.6	2.11938e+06	1.3	23161.2	0.7	63175.5	0.7	34197692	0.7
	FALSE	020SMPL.d	2019-10-17 16:29:34	Sample		FA 8	2.59543e+07	2.1	5138228	4.4	2.69915e+07	1.4	63116.7	0.1	1.0593e+06	2	3.86501e+07	1.2
	FALSE	021SMPL.d	2019-10-17 16:31:51	Sample		FA 9	3.17838e+07	2	6.78733e+06	1	2.99412e+07	1	80783.2	0.9	2.38897e+06	1	4.21706e+07	1.8
56 Fe [ No Gas ] : CPS RSD value = 15.33 is over the allowed maximum = 5.00	FALSE	022SMPL.d	2019-10-17 16:34:09	Sample		FA 10	3.62065e+07	2.9	1.37727e+06	15.3	1.8041e+07	1.6	111450	0.7	2.38059e+06	2.3	3.65389e+07	2.8
56 Fe [ No Gas ] : CPS RSD value = 35.90 is over the allowed maximum = 5.00	FALSE	023SMPL.d	2019-10-17 16:36:24	Sample		Blank Check	3979.51	23.9	218922	35.9	9025.13	18.6	-38.67	-13.7	2191.71	24	42052632	1
	FALSE	024SMPL.d	2019-10-17 16:38:43	Sample		QC 5 500	2.71954e+08	0.4	270239687	0.9	4.64387e+07	1.1	4.767e+06	1.3	2.66292e+07	0.5	4.19209e+07	0.4
56 Fe [ No Gas ] : CPS RSD value = 16.39 is over the allowed maximum = 5.00	FALSE	025SMPL.d	2019-10-17 16:41:09	Sample		FA 11	2.48737e+07	3.2	567829	16.4	1.86128e+07	0.7	132814	0.8	1.0855e+06	1.2	3.94715e+07	2.5
	FALSE	026SMPL.d	2019-10-17 16:43:25	Sample		FA 12	5.46456e+07	1.6	2.8062e+06	2.7	3.84679e+07	1.6	221553	0.9	6.87731e+06	1.9	4.28068e+07	0.9
	FALSE	027SMPL.d	2019-10-17 16:45:39	Sample		FA 13	5.20743e+07	1.8	2.76328e+06	5	3.32144e+07	0.3	181987	0.8	5.69046e+06	0.7	41748400	1.4
	FALSE	028SMPL.d	2019-10-17 16:47:58	Sample		FA 14	5.10623e+07	0.8	4.54609e+06	3	2.91171e+07	0.7	122229	1.4	5.48767e+06	1.6	4.47641e+07	1
56 Fe [ No Gas ] : CPS RSD value = 13.94 is over the allowed maximum = 5.00	FALSE	029SMPL.d	2019-10-17 16:50:14	Sample		Blank Check	8028.28	7.7	529868	13.9	17546.1	3.5	-5.34	-1220.3	4767.13	17.7	4.52289e+07	3.3
45 Sc ( ISTD ) [ No Gas ] : ISTD Recovery Percent value = 120.34 is outside the allowed range [80.00, 120.00]	FALSE	030SMPL.d	2019-10-17 16:52:33	Sample		QC 5 500	2.94849e+08	1.3	297245639	0.5	4.89832e+07	2	4.98575e+06	2	2.92782e+07	0.6	46500808	1.8

## Sheet: Turkey_Total
	mg/kg
Downstream	TC Cd	TC Zn	TC Pb	PEC-Q
1	12	1480	274	7.77466
2	7.9	1210	212	5.87876
3	6.2	1050	346	6.23569
4	20.9	2860	471	14.1074
5	65.5	7180	1870	43.4047
6	20.5	4130	1000	20.9268
7	6.3	585	71	3.09426
8	53.6	7280	590	31.233
9	11.2	1830	127	7.22811
10	8.6	271	64	2.81732
11	4.4	462	51	2.28851
12	5.7	854	128	4.00514
13	10.1	1460	144	6.33394
14	19.3	2420	291	11.4213
15	12.1	1710	163	7.42865
16	17.5	5070	453	18.0989
17	10.8	3570	176	11.3215
18	4.3	942	122	3.86887
19	9.5	2280	131	7.89839
20	3.7	902	110	3.56749
21	4.5	915	115	3.79552
22	21.3	6950	161	20.6765
23	10.2	2490	146	8.61365
24	12.9	3280	185	11.1816
25	10.6	1920	159	7.55371
26	113.5	37100	192	105.119
27	10.2	2710	118	8.87421
28	10.8	2700	142	9.1604
29	127	35800	226	105.263
30	35.4	8190	152	26.1391

## Sheet: Center_total
Center Creek by Joplin	WEI-21	ME-ICP41	ME-ICP41	ME-ICP41	ME-ICP41	ME-ICP41	ME-ICP41	ME-ICP41	ME-ICP41	ME-ICP41	ME-ICP41	ME-ICP41	ME-ICP41	ME-ICP41	ME-ICP41	ME-ICP41	ME-ICP41	ME-ICP41	ME-ICP41	ME-ICP41	ME-ICP41	ME-ICP41	ME-ICP41	ME-ICP41	ME-ICP41	ME-ICP41	ME-ICP41	ME-ICP41	ME-ICP41	ME-ICP41	ME-ICP41	ME-ICP41	ME-ICP41	ME-ICP41	ME-ICP41	ME-ICP41
SAMPLE	Recvd Wt.	Ag	Al	As	B	Ba	Be	Bi	Ca	Cd	Co	Cr	Cu	Fe	Ga	Hg	K	La	Mg	Mn	Mo	Na	Ni	P	Pb	S	Sb	Sc	Sr	Th	Ti	Tl	U	V	W	Zn
DESCRIPTION	kg	ppm	%	ppm	ppm	ppm	ppm	ppm	%	ppm	ppm	ppm	ppm	%	ppm	ppm	%	ppm	%	ppm	ppm	%	ppm	ppm	ppm	%	ppm	ppm	ppm	ppm	%	ppm	ppm	ppm	ppm	ppm
S1	0.02	<0.2	0.81	3	<10	80	0.6	<2	4.69	54.3	10	13	23	1.06	<10	<1	0.07	20	0.92	470	<1	0.01	17	650	595	0.5	3	2	30	<20	0.01	<10	<10	18	<10	9930
S2	0.03	<0.2	0.57	4	<10	50	0.5	<2	4.27	37.2	7	22	18	1.17	<10	<1	0.04	10	0.72	422	<1	0.01	13	410	596	0.29	2	1	24	<20	0.01	<10	<10	22	<10	9480
S3	0.03	0.3	1.18	10	<10	230	0.9	<2	3.88	16.7	19	61	27	2.74	10	<1	0.09	10	0.63	1595	1	0.01	18	730	1010	0.14	2	2	32	<20	0.02	<10	<10	60	<10	7000
S4	0.03	0.2	1.03	30	<10	140	1.6	<2	4.25	6.4	23	219	15	7.12	10	<1	0.05	10	1.03	1520	3	0.01	26	920	898	0.07	2	2	27	<20	0.03	<10	<10	155	<10	4810
S5	0.03	<0.2	1.04	3	<10	150	0.7	2	0.35	3.9	9	17	10	1.24	<10	1	0.09	20	0.09	854	<1	0.01	10	390	85	0.01	<2	2	9	<20	0.01	<10	<10	23	<10	436
S6	0.03	<0.2	1.11	3	<10	150	0.8	2	0.36	4	9	18	10	1.33	<10	<1	0.09	20	0.09	934	<1	0.01	11	400	88	0.01	<2	2	9	<20	0.01	<10	<10	25	<10	441
S7	0.03	<0.2	1.09	5	<10	150	0.8	<2	0.41	3.8	9	18	10	1.28	<10	1	0.09	20	0.09	904	<1	0.01	10	400	76	0.01	<2	2	9	<20	0.01	<10	<10	24	<10	426
S8	0.03	<0.2	0.94	7	<10	110	0.8	<2	1.33	77.4	10	26	17	1.77	<10	<1	0.06	20	0.09	434	<1	0.04	17	670	420	0.16	<2	2	28	<20	0.01	<10	<10	28	<10	6790
S9	0.03	<0.2	0.96	5	<10	140	0.8	<2	1.06	50.7	10	26	17	2.22	<10	1	0.06	20	0.1	496	<1	0.05	18	680	469	0.13	<2	2	42	<20	0.02	<10	<10	28	<10	5810
S10	0.03	0.2	0.97	8	<10	120	1	<2	0.79	16.7	11	71	15	2.7	<10	<1	0.06	20	0.08	946	1	0.02	19	840	481	0.04	<2	2	19	<20	0.02	<10	<10	52	<10	2330
S11	0.03	<0.2	1.11	6	<10	140	1	<2	0.57	17.8	11	52	18	2.45	<10	1	0.07	20	0.09	938	1	0.01	18	980	464	0.05	2	2	13	<20	0.02	<10	<10	42	<10	2510
S12	0.03	<0.2	0.73	6	<10	120	0.6	<2	1	42.5	8	19	21	1.47	<10	<1	0.06	10	0.09	691	<1	0.01	12	500	726	0.19	2	2	20	<20	0.01	<10	<10	21	<10	6030
S13	0.03	<0.2	0.62	6	<10	100	0.6	<2	1.09	34.5	8	31	14	1.64	<10	1	0.04	10	0.08	651	<1	0.01	12	500	573	0.16	<2	2	25	<20	0.01	<10	<10	28	<10	5140
S14	0.03	<0.2	0.67	4	<10	100	0.6	<2	1.12	53.7	8	23	17	1.5	<10	<1	0.05	10	0.1	573	<1	0.01	11	490	561	0.25	2	2	17	<20	0.01	<10	<10	22	<10	8360
